# Supplementary material for: Loss and Natural Variations of Blast Fungal Avirulence Genes Breakdown Rice Resistance Genes in the Sichuan Basin of China
Source: Front Plant Sci. 2022 Apr 12;13:788876. doi: 10.3389/fpls.2022.788876 (PMC9040519; doi:10.3389/fpls.2022.788876)
Supplement: Supplementary file 1 [file Data_Sheet_1.xlsx]

## Sheet: Table S1
Table S1. Primers used in this study
Primer name	Sequences (5' to 3')	Product size (bp)	Location	GeneBank accession	Reference
AvrPikF	TCACGGTTTGAAGAGGGGG	750	1237-1255	AB498875.1	This study
AvrPikR	GGCTGCGGGGCTGTTATG		1969-1986
AvrPikF1	ATGCGTGTTACCACTTTTAACAC	560	1427-1449		This study
AvrPi9F	TGAGTGTCGCCATGAACATCA	793	963-983	KM004023.1	This study
AvrPi9R	CCCAGCATCAACACCCTTCT		1736-1755
AvrPiiF	TTATGCAGGCCCAAATCCGT	678	361-380	AB498874.1	This study
AvrPiiR	GCTCGCAGTATCCTCGGTTT		1019-1038
AvrPiaF	ATTGCTACCACCTTCCTCCG	649	1252-1271	AB498873.1	This study
AvrPiaR	GCCTACCCTGGTTTCATCGT		1881-1900
AvrPi54F	TCAGCATCAACATCATCTGCCT	774	156-177	HF545677.2	This study
AvrPi54R	CCGAATGAGCGTGTCCGAAT		910-929
AvrPiztF	TCTCCTTCTCCACCATCC	738	1224-1241	HE650817	This study
AvrPiztR	AGAATGTACTCTAGCAAACGAC		1940-1961
AvrPibF	GAAGACTTTGATGCAAATGG	597	863-882	KM887844.1	(Olukayode et al. 2019)
AvrPibR	GAGAATGCTAGCTAGATCTG		1440-1459
AvrPibF2	ACACTCCAACCAATATAACACC	435	1025-1046		This study
AvrPita1F	CAGGCATACATTGGAGAGCC	1549	495-511	AF207841.1	(GAN et al., 2018)
AvrPita1R	CCCTCCATTCCAACACTAAC		2021-2040
MAT1-1F	GACATCAAGGCTCGTCGAC	650	211-229	XM_003720674.1	(Olukayode et al. 2019)
MAT1-1R	GAGTGCGCCATTAGGAAGC		852-870
MAT1-2F	GGACCTCGAATTCGTCGAC	300	-	AB372210.1
MAT1-2R	GGCATCTTTCAGGATAGACC

## Sheet: Table S2
Table S2. Avirulence genes in M.oryzae population from Sichuan Basin.
Strain	AVR-Pik	AVR-Pi54	AVRPiz-t	AVR-Pi9	AVR-Pib	AVR-Pita1	AVR-Pii	AVR-Pia	Mating type	APs of AVR-Pib	APs of AVR-Pizt	AVR-Pik Haplotype	Group
YS-001	P	P	P	P	P	A	P	A	MAT1-2	3	2	E	D
YS-002	P	P	A	P	P	A	P	A	MAT1-2	3	0	E	K
YS-003	P	P	P	P	P	A	P	A	MAT1-2	3	1	E	D
YS-004	P	P	P	P	P	A	P	A	MAT1-2	3	2	E	D
YS-005	P	P	P	P	A	A	P	A	MAT1-2	0	1	E	I
YS-006	P	P	P	P	P	A	P	A	MAT1-2	3	1	E	D
YS-007	P	P	P	P	P	A	A	A	MAT1-2	3	1	E	G
YS-008	P	P	P	P	P	A	P	A	MAT1-2	3	1	E	D
YS-009	P	P	P	P	P	A	P	A	MAT1-2	3	2	E	D
YS-010	P	P	P	P	P	A	P	A	MAT1-2	3	2	E	D
YS-011	P	P	P	P	P	A	P	A	MAT1-2	3	2	E	D
YS-012	P	P	P	P	P	A	P	A	MAT1-2	3	2	E	D
YS-014	P	P	P	P	P	A	P	A	MAT1-2	3	1	E	D
YS-015	P	P	P	P	P	A	P	A	MAT1-2	1	2	E	D
YS-016	P	P	P	P	P	A	P	A	MAT1-2	1	1	E	D
YS-018	P	P	P	P	P	A	P	A	MAT1-2	3	2	E	D
YS-022	P	P	P	P	P	A	P	A	MAT1-2	1	2	E	D
YS-023	P	P	P	P	P	P	A	A	MAT1-2	3	2	D/E	C
YS-024	P	P	P	P	P	A	P	A	MAT1-2	1	1	E	D
YS-025	P	P	P	P	P	A	P	A	MAT1-2	1	1	E	D
YS-027	P	P	P	A	P	A	P	A	MAT1-2	3	1	D/E	L
YS-028	P	P	P	P	P	A	P	A	MAT1-2	3	1	E	D
YS-029	P	P	P	P	P	A	P	A	MAT1-2	3	2	E	D
YS-030	P	P	P	P	P	P	A	P	MAT1-1	3	2	E	B
YS-031	P	P	P	P	P	A	P	A	MAT1-2	1	1	E	D
YS-033	P	P	P	P	P	A	P	A	MAT1-2	1	2	E	D
YS-034	P	P	P	P	P	P	A	A	MAT1-2	1	1	D/E	C
YS-036	P	P	P	P	P	P	A	P	MAT1-1	3	2	C	B
YS-037	P	P	P	P	A	A	P	A	MAT1-2	0	2	D/E	I
YS-038	P	P	P	P	P	A	P	A	MAT1-2	1	2	E	D
YS-039	P	P	P	P	A	A	P	A	MAT1-2	0	2	E	I
YS-040	P	P	P	P	P	A	P	A	MAT1-2	1	1	E	D
YS-041	P	P	P	P	P	A	P	A	MAT1-2	1	2	E	D
YS-042	P	P	P	P	A	A	P	A	MAT1-2	0	2	E	I
YS-043	P	P	P	P	P	P	A	A	MAT1-2	1	2	D/E	C
YS-046	P	P	P	P	P	P	A	A	MAT1-2	1	1	D/E	C
YS-048	P	P	P	A	P	A	A	A	MAT1-2	1	1	E	O
YS-049	P	P	P	P	P	P	A	A	MAT1-2	3	1	D/E	C
YS-050	P	P	P	P	P	A	P	A	MAT1-2	1	1	E	D
YS-051	P	P	A	P	P	P	A	A	MAT1-2	1	0	D/E	H
YS-052	P	P	P	P	P	A	P	A	MAT1-2	1	2	E	D
YS-054	P	P	P	P	P	A	P	A	MAT1-2	1	2	E	D
YS-056	P	P	P	P	P	A	P	A	MAT1-2	3	2	E	D
YS-057	P	P	P	P	P	A	P	A	MAT1-2	1	1	E	D
YS-060	P	P	P	P	P	P	A	A	MAT1-2	3	2	D/E	C
YS-061	P	P	P	P	P	A	P	A	MAT1-2	3	2	E	D
YS-062	P	P	P	P	P	P	A	A	MAT1-2	3	2	D/E	C
YS-064	P	P	P	P	P	P	A	A	MAT1-2	3	2	D/E	C
YS-066	P	P	P	P	P	P	A	A	MAT1-2	3	1	D/E	C
YS-067	P	P	P	P	P	P	A	A	MAT1-2	3	1	D/E	C
YS-068	P	P	P	P	P	A	P	A	MAT1-2	3	2	E	D
YS-069	P	P	P	P	P	A	P	A	MAT1-2	3	2	E	D
YS-070	P	P	P	P	P	A	P	A	MAT1-2	3	2	E	D
YS-071	P	P	P	P	P	P	A	A	MAT1-2	3	1	D/E	C
YS-072	P	P	P	P	P	P	A	A	MAT1-2	3	1	D/E	C
YS-073	P	P	P	P	P	P	A	A	MAT1-2	3	1	D/E	C
YS-074	P	P	P	P	P	P	A	A	MAT1-2	3	2	D/E	C
YS-075	P	P	P	P	P	A	P	A	MAT1-2	1	1	A/D	D
YS-076	P	P	P	P	P	A	P	A	MAT1-2	3	2	E	D
YS-077	P	P	P	P	P	A	P	A	MAT1-2	1	1	E	D
YS-082	P	P	P	P	P	P	A	A	MAT1-2	3	2	D/E	C
YS-084	P	P	P	P	P	P	A	A	MAT1-2	3	2	D/E	C
YS-085	P	P	P	P	P	P	A	A	MAT1-2	3	2	D/E	C
YS-086	P	P	P	P	P	P	A	A	MAT1-2	3	1	D/E	C
YS-088	P	P	P	P	P	A	P	A	MAT1-2	1	1	E	D
YS-089	P	P	P	P	P	P	A	A	MAT1-2	1	2	D/E	C
YS-091	P	P	P	P	P	P	A	A	MAT1-2	3	1	D/E	C
YS-092	P	P	P	P	P	A	P	A	MAT1-2	1	1	E	D
YS-093	P	P	P	P	P	P	P	A	MAT1-2	1	2	E	A
YS-094	P	P	P	P	P	P	A	A	MAT1-2	3	2	D/E	C
YS-095	P	P	P	P	P	P	P	A	MAT1-2	3	2	D/E	A
YS-096	P	P	P	P	P	P	A	A	MAT1-2	3	1	D/E	C
YS-100	P	P	P	P	P	P	A	A	MAT1-2	3	1	D/E	C
YS-101	P	P	P	P	P	P	A	A	MAT1-2	3	1	D/E	C
YS-102	P	P	P	P	P	A	P	A	MAT1-2	1	1	E	D
YS-103	P	P	P	P	P	P	A	A	MAT1-2	3	2	D/E	C
YS-104	P	P	P	P	P	P	A	A	MAT1-2	1	2	D/E	C
YS-105	P	P	P	P	P	P	A	A	MAT1-2	3	1	D/E	C
YS-106	P	P	P	P	P	A	P	A	MAT1-2	1	1	E	D
YS-110	P	P	P	P	P	P	A	A	MAT1-2	3	1	D/E	C
YS-111	P	P	P	P	P	P	P	A	MAT1-2	3	1	D/E	A
YS-113	P	P	P	P	P	A	P	A	MAT1-2	1	1	E	D
YS-119	P	P	P	P	P	A	P	A	MAT1-2	3	2	E	D
YS-121	P	P	P	P	P	A	P	A	MAT1-2	1	1	E	D
YS-122	P	P	P	P	P	A	P	A	MAT1-2	1	1	E	D
YS-124	P	P	P	P	P	P	P	A	MAT1-2	1	1	E	A
YS-125	P	P	P	P	P	A	P	A	MAT1-2	1	1	E	D
YS-126	P	P	P	P	P	A	P	A	MAT1-2	1	1	E	D
YS-127	P	P	P	P	P	P	P	A	MAT1-2	1	1	E	A
YS-128	P	P	P	P	P	A	P	A	MAT1-2	1	2	E	D
YS-129	P	P	P	P	P	A	P	A	MAT1-2	1	1	E	D
YS-130	P	P	P	P	P	A	P	A	MAT1-2	1	1	E	D
YS-131	P	P	P	P	P	A	P	A	Hermaphrodite	1	2	E	D
YS-135	P	P	P	P	P	P	A	A	MAT1-2	3	2	D/E	C
YS-136	P	P	A	P	P	P	A	A	MAT1-2	1	0	D/E	H
YS-138	P	P	P	P	P	A	A	A	MAT1-2	1	2	E	G
YS-139	P	P	P	A	P	A	P	A	MAT1-2	1	2	E	L
YS-140	P	P	P	P	P	A	P	A	MAT1-2	1	2	E	D
YS-141	P	P	P	P	P	A	A	A	MAT1-2	3	2	E	G
YS-142	P	P	P	P	P	A	P	A	MAT1-2	1	2	E	D
YS-143	P	P	P	A	A	A	P	A	MAT1-2	0	2	E	P
DZ-001	P	P	P	P	P	P	A	A	MAT1-1	3	2	A/D	C
DZ-002	P	P	P	P	P	P	A	A	MAT1-1	1	2	A/D	C
DZ-003	P	P	P	P	P	P	A	A	MAT1-1	1	2	A/D	C
DZ-004	P	P	P	P	P	P	A	A	MAT1-1	1	2	A/D	C
DZ-007	P	P	P	P	P	P	A	A	MAT1-1	3	1	A/D	C
DZ-008	P	P	P	P	P	P	A	A	MAT1-1	1	2	A/D	C
DZ-009	P	P	P	P	P	P	A	A	MAT1-1	1	2	A/D	C
DZ-011	P	P	P	P	P	P	A	A	MAT1-1	1	2	A/D	C
DZ-013	P	P	P	P	P	P	A	A	MAT1-1	3	2	A/D	C
DZ-014	P	P	P	A	P	P	A	A	MAT1-1	1	1	A/D	J
DZ-015	P	P	P	P	P	P	A	A	Hermaphrodite	1	1	A/D	C
DZ-016	P	P	P	P	P	P	A	A	MAT1-1	1	1	A/D	C
DZ-017	P	P	P	P	P	P	A	A	MAT1-1	3	2	A/D	C
DZ-019	P	P	P	P	P	P	A	A	MAT1-1	3	2	A/D	C
DZ-021	P	P	P	P	P	P	A	A	MAT1-1	3	2	A/D	C
DZ-022	P	P	P	P	P	P	A	A	MAT1-1	1	2	A/D	C
DZ-023	P	P	P	P	P	P	P	A	MAT1-1	1	2	A/D	A
DZ-024	P	P	P	P	P	P	P	A	Hermaphrodite	1	2	A/D	A
DZ-025	P	P	P	P	P	P	A	A	MAT1-1	3	1	A/D	C
DZ-026	P	P	P	P	P	P	A	A	Hermaphrodite	1	1	A/D	C
DZ-027	P	P	P	P	P	P	P	A	Hermaphrodite	3	2	A/D	A
DZ-030	P	P	P	P	P	P	A	A	Hermaphrodite	1	2	A/D	C
DZ-032	P	P	P	P	P	P	A	A	Hermaphrodite	1	2	A/D	C
DZ-033	P	P	P	A	P	P	A	P	Hermaphrodite	1	2	A/D	F
DZ-036	P	P	P	P	P	P	A	A	Hermaphrodite	1	2	A/D	C
DZ-037	P	P	P	P	P	P	A	A	Hermaphrodite	1	2	A/D	C
DZ-039	P	P	P	P	P	P	A	A	Hermaphrodite	1	2	A/D	C
DZ-040	P	P	P	P	P	P	A	A	MAT1-1	1	1	A/D	C
DZ-041	P	P	P	P	P	P	A	A	Hermaphrodite	1	2	A/D	C
DZ-042	P	P	P	P	P	P	A	A	MAT1-1	1	2	A/D	C
DZ-043	P	P	P	P	P	P	A	A	MAT1-1	1	2	A/D	C
DZ-046	P	P	P	P	P	P	A	A	MAT1-1	1	2	A/D	C
DZ-047	P	P	P	P	P	P	A	A	MAT1-1	1	2	A/D	C
DZ-048	P	P	P	P	P	P	P	A	Hermaphrodite	1	2	A/D	A
DZ-049	P	P	P	P	P	P	A	A	MAT1-1	1	2	A/D	C
DZ-050	P	P	P	P	P	P	A	A	Hermaphrodite	1	2	A/D	C
DZ-051	P	P	P	P	P	P	P	A	Hermaphrodite	1	2	A/D	A
DZ-052	P	P	P	A	P	P	A	A	Hermaphrodite	1	2	A/D	J
DZ-053	P	P	P	P	P	P	A	A	MAT1-1	1	2	A/D	C
DZ-054	P	P	P	P	P	P	A	A	Hermaphrodite	1	2	A/D	C
DZ-055	P	P	P	P	P	A	P	A	MAT1-2	1	2	E	D
DZ-057	P	P	P	P	P	P	A	A	Hermaphrodite	1	1	A/D	C
DZ-058	P	P	P	P	P	P	A	A	MAT1-1	1	2	A/D	C
DZ-059	P	P	P	A	P	P	A	A	Hermaphrodite	1	2	A/D	J
DZ-061	P	P	P	P	P	P	A	A	Hermaphrodite	1	2	A/D	C
DZ-067	P	P	P	A	P	P	A	A	Hermaphrodite	1	1	A/D	J
DZ-068	P	P	P	P	P	P	A	A	Hermaphrodite	1	2	A/D	C
DZ-070	P	P	P	P	P	P	A	A	Hermaphrodite	1	2	A/D	C
DZ-071	P	P	P	P	P	A	A	A	MAT1-1	3	2	A/D	G
DZ-073	P	P	P	P	P	P	A	A	MAT1-1	1	2	A/D	C
DZ-074	P	P	P	P	P	P	A	A	MAT1-1	1	2	A/D	C
DZ-075	P	P	P	P	P	P	A	A	MAT1-1	1	2	A/D	C
DZ-076	P	P	P	P	P	P	A	A	MAT1-1	1	2	A/D	C
DZ-078	P	P	P	P	P	P	A	A	MAT1-1	1	2	A/D	C
DZ-079	P	P	P	P	P	P	A	A	MAT1-1	3	2	A/D	C
DZ-080	P	P	P	P	P	P	A	A	MAT1-1	1	2	A/D	C
DZ-081	P	P	P	P	P	P	A	A	MAT1-1	1	2	A/D	C
DZ-082	P	P	P	A	P	P	A	A	MAT1-1	1	1	A/D	J
DZ-083	P	P	P	P	P	P	A	A	MAT1-1	1	1	A/D	C
DZ-085	P	P	P	P	P	P	A	A	MAT1-1	1	2	A/D	C
DZ-087	P	P	P	P	P	P	A	A	MAT1-1	1	2	A/D	C
DZ-088	P	P	P	P	P	P	A	A	MAT1-1	1	2	A/D	C
DZ-090	P	P	P	P	P	P	A	A	MAT1-1	1	2	A/D	C
DZ-091	P	P	P	P	P	P	A	A	MAT1-1	1	2	A/D	C
DZ-092	P	P	P	P	P	P	A	A	MAT1-1	1	2	A/D	C
DZ-094	P	P	P	P	P	P	A	A	MAT1-1	1	2	A/D	C
DZ-095	P	P	P	P	P	P	A	A	MAT1-1	1	2	A/D	C
DZ-096	P	P	P	P	P	P	P	A	Hermaphrodite	1	2	A/D	A
DZ-097	P	P	P	P	P	P	P	A	Hermaphrodite	1	2	A/D	A
DZ-098	P	P	P	P	P	P	A	A	Hermaphrodite	1	2	A/D	C
DZ-099	P	P	P	P	P	P	A	A	MAT1-1	1	1	A/D	C
DZ-101	P	P	P	P	P	P	A	A	MAT1-1	1	2	A/D	C
DZ-103	P	P	P	P	P	A	A	A	MAT1-1	1	2	A/D	G
DZ-104	P	P	P	P	P	A	P	A	MAT1-1	1	2	A/D	D
DZ-105	P	P	P	P	P	A	P	A	MAT1-1	1	2	A/D	D
DZ-106	P	P	P	P	P	A	P	A	MAT1-2	1	2	E	D
DZ-107	P	P	P	P	P	A	A	A	MAT1-1	1	2	A/D	G
DZ-108	P	P	P	P	P	P	A	A	Hermaphrodite	1	2	A/D	C
DZ-109	P	P	P	P	P	A	A	A	MAT1-1	1	2	A/D	G
DZ-110	P	P	P	P	P	A	A	A	MAT1-1	1	2	A/D	G
DZ-111	P	P	P	P	P	A	A	A	MAT1-1	1	2	A/D	G
DZ-113	P	P	P	P	P	A	A	A	MAT1-1	1	2	A/D	G
DZ-114	P	P	P	P	P	A	A	A	MAT1-1	1	2	A/D	G
DZ-115	P	P	P	P	P	P	A	A	MAT1-1	1	2	A/D	C
TJ-004	P	P	P	P	P	P	A	A	MAT1-1	1	2	A/D	C
TJ-006	P	P	P	P	P	P	A	A	MAT1-1	3	2	A/D	C
TJ-007	P	P	P	P	P	P	A	A	MAT1-1	1	2	A/D	C
TJ-008	P	P	P	P	P	P	P	A	MAT1-1	1	2	A/D	A
TJ-010	P	P	P	P	P	P	A	A	MAT1-1	3	2	A/D	C
TJ-011	P	P	P	P	P	P	A	A	MAT1-1	1	2	A/D	C
TJ-013	P	P	P	P	P	P	A	A	MAT1-1	3	2	A/D	C
TJ-014	P	P	P	P	P	P	P	A	MAT1-1	3	2	A/D	A
TJ-017	P	P	P	P	P	P	A	A	MAT1-1	1	2	A/D	C
TJ-018	P	P	P	P	P	P	A	A	MAT1-1	3	2	A/D	C
TJ-020	P	P	P	P	P	P	A	A	MAT1-1	3	2	A/D	C
TJ-022	P	P	P	P	A	A	A	A	MAT1-1	0	2	A/D	N
TJ-023	P	P	P	P	P	P	A	A	MAT1-1	3	2	A/D	C
TJ-024	P	P	P	P	P	P	A	A	MAT1-1	1	2	A/D	C
TJ-026	P	P	P	P	P	P	A	A	MAT1-1	3	2	A/D	C
TJ-032	P	P	P	P	P	P	A	A	MAT1-1	1	2	A/D	C
TJ-033	P	P	P	P	P	P	A	A	MAT1-1	1	2	A/D	C
TJ-044	P	P	P	P	P	P	A	A	MAT1-1	1	2	A/D	C
TJ-046	P	P	P	P	P	P	A	A	MAT1-1	1	2	A/D	C
TJ-050	P	P	P	P	P	P	A	A	MAT1-1	1	2	A/D	C
TJ-051	P	P	P	P	P	P	A	A	MAT1-1	1	2	A/D	C
TJ-052	P	P	P	P	P	A	A	A	MAT1-1	3	2	A/D	G
TJ-056	P	P	P	P	P	P	A	A	MAT1-1	1	2	A/D	C
TJ-057	P	P	P	P	P	P	A	A	MAT1-1	1	2	A/D	C
TJ-058	P	P	P	P	P	P	A	A	MAT1-1	1	2	A/D	C
TJ-059	P	P	P	P	P	P	A	A	MAT1-1	3	2	A/D	C
TJ-060	P	P	P	P	P	P	A	A	MAT1-1	1	2	A/D	C
TJ-066	P	P	P	P	A	P	A	A	MAT1-1	0	2	A/D	M
TJ-071	P	P	P	P	P	P	A	A	Hermaphrodite	3	2	A/D	C
TJ-081	P	P	P	P	P	P	P	A	Hermaphrodite	3	2	A/D	A
TJ-084	P	P	P	P	P	P	A	A	MAT1-1	3	2	A/D	C
TJ-089	P	P	P	P	P	P	A	A	MAT1-1	3	2	A/D	C
TJ-090	P	P	P	P	P	P	A	A	MAT1-1	3	2	A/D	C
TJ-092	P	P	P	P	P	P	A	A	Hermaphrodite	3	2	A/D	C
TJ-093	P	P	P	P	P	P	A	A	MAT1-1	3	2	A/D	C
TJ-094	P	P	P	P	P	P	A	A	MAT1-1	3	2	A/D	C
TJ-097	P	P	P	P	P	P	A	A	MAT1-1	3	2	A/D	C
TJ-099	P	P	P	P	P	P	A	A	MAT1-1	3	2	A/D	C
TJ-100	P	P	P	P	P	P	A	A	MAT1-1	3	2	A/D	C
TJ-101	P	P	P	P	P	P	A	A	MAT1-1	3	2	A/D	C
TJ-102	P	P	P	P	P	P	A	A	Hermaphrodite	3	2	A/D	C
TJ-103	P	P	P	P	P	P	A	A	MAT1-1	3	2	A/D	C
TJ-105	P	P	P	P	P	P	A	A	MAT1-1	3	2	A/D	C
TJ-107	P	P	P	P	P	P	A	A	Hermaphrodite	1	2	A/D	C
TJ-108	P	P	P	P	P	P	A	A	MAT1-1	3	2	A/D	C
TJ-109	P	P	P	P	P	P	A	A	MAT1-1	3	2	A/D	C
TJ-110	P	P	P	P	P	P	P	A	Hermaphrodite	3	2	A/D	A
TJ-111	P	P	P	P	P	P	A	A	MAT1-1	1	2	A/D	C
QW01-1	P	P	P	P	P	A	P	A	MAT1-2	3	2	E	D
QW02-2	P	P	P	P	P	A	P	A	MAT1-2	3	2	E	D
QW13-2	P	P	P	P	P	A	P	A	MAT1-2	3	2	E	D
QW14-1	P	P	P	P	A	A	P	A	MAT1-2	0	2	E	I
QW17-2	P	P	P	P	P	A	P	A	MAT1-2	3	2	E	D
QW25-3	P	P	P	P	P	P	A	A	MAT1-1	3	2	D	C
QW26-3	P	P	P	P	P	A	P	A	MAT1-2	3	2	E	D
QW27-2	P	P	P	P	P	A	P	A	MAT1-2	3	2	E	D
QW31-2	P	P	P	P	P	A	P	A	MAT1-2	3	2	E	D
QW36-2	P	P	P	P	A	A	P	A	MAT1-2	0	2	E	I
QW38-1	P	P	P	P	P	P	A	A	MAT1-1	3	2	E	C
QW39-1	P	P	P	P	P	A	P	A	MAT1-2	3	2	D	D
QW80-2	P	P	P	P	P	A	P	A	MAT1-2	3	2	E	D
QW81-1	P	P	P	P	P	P	A	A	MAT1-1	3	2	E	C
QW74-1	P	P	P	P	P	P	A	A	MAT1-1	3	2	D	C
YA26-1	P	P	P	P	A	P	P	A	MAT1-2	0	2	D	E
YA29-4	P	P	P	P	P	A	P	A	MAT1-2	3	2	E	D
YA30-3	P	P	P	P	P	A	P	A	MAT1-2	3	2	E	D
YA33-3	P	P	P	P	P	A	A	A	MAT1-2	2	2	E	G
YA34-3-2	P	P	P	P	A	P	A	A	MAT1-2	0	2	E	M
YA37-2	P	P	P	P	A	A	A	A	MAT1-2	0	2	E	N
YA38-2	P	P	P	P	P	P	P	A	Hermaphrodite	3	2	A	A
YA39-4	P	P	P	P	A	A	A	A	MAT1-2	0	2	E	N
YA40-2	P	P	P	P	P	A	A	A	MAT1-2	2	2	E	G
YA41-4	P	P	P	P	P	P	A	A	Hermaphrodite	3	2	A	C
YA44-2	P	P	P	P	P	P	A	A	Hermaphrodite	3	2	A	C
YA45-3	P	P	P	P	P	P	A	A	Hermaphrodite	3	2	A	C
YA47-4	P	P	P	P	P	A	P	A	MAT1-2	2	2	E	D
YA49-3	P	P	P	P	P	P	P	A	Hermaphrodite	3	2	A	A
YA50-2	P	P	P	P	A	A	A	A	MAT1-2	0	2	E	N
YA51-4	P	P	P	P	P	A	P	A	MAT1-2	2	2	E	D
YA54-4	P	P	P	P	P	A	P	A	MAT1-2	2	2	E	D
YA62-3	P	P	P	P	P	A	A	A	MAT1-2	2	2	E	G
YA66-4	P	P	P	P	A	A	A	A	MAT1-2	0	2	E	N
YA91-3	P	P	P	P	P	A	A	A	MAT1-2	2	2	E	G
NB-28	P	P	P	P	P	A	A	A	MAT1-1	1	2	B	G
NB-26	P	P	P	P	P	A	A	A	MAT1-1	3	2	B	G
NB-55	P	P	P	P	P	A	A	A	MAT1-1	3	2	B	G
NB-65	P	P	P	P	P	A	A	A	MAT1-1	3	2	B	G
NB-113	P	P	P	P	P	A	A	A	MAT1-1	3	2	B	G
NB-124	P	P	P	A	P	A	A	A	MAT1-1	3	2	B	O
NB-74	P	P	P	P	P	A	A	A	MAT1-1	1	2	B	G
NB-89	P	P	P	P	P	A	A	A	MAT1-1	1	2	B	G
NB-96	P	P	P	P	P	A	A	A	MAT1-1	1	2	B	G
NB-103	P	P	P	P	P	A	A	A	MAT1-1	1	2	B	G
NX-80	P	P	A	P	P	P	A	A	MAT1-2	1	0	D/E	H
NX-4	P	P	P	P	P	A	A	A	MAT1-1	3	2	A	G
NX-22	P	P	P	P	P	A	A	A	MAT1-1	3	2	A	G
NX-38	P	P	P	P	P	A	A	A	MAT1-1	3	2	A	G
NX-44	P	P	P	P	P	A	A	A	MAT1-1	3	2	A	G
NX-72	P	P	P	P	P	A	A	A	MAT1-1	3	2	A	G
NX-9	P	P	P	P	P	A	A	A	MAT1-1	3	2	A	G
NX-43	P	P	P	P	P	A	A	A	MAT1-1	3	2	A	G
NX-50	P	P	P	P	P	A	A	A	MAT1-1	3	2	A	G
NX-79	P	P	P	P	P	A	A	A	MAT1-1	3	2	A	G
PX-76	P	P	P	P	P	A	A	A	MAT1-1	1	2	A/D	G
PX-79	P	P	P	P	P	A	A	A	MAT1-1	1	2	B	G
PX-4	P	P	P	P	P	A	A	A	MAT1-1	1	2	B	G
PX-6	P	P	P	P	P	A	A	A	MAT1-1	1	2	B	G
PX-7	P	P	P	P	P	A	A	A	MAT1-1	3	2	B	G
PX-8	P	P	P	P	P	A	A	A	MAT1-1	1	2	B	G
PX-15	P	P	P	P	P	A	A	A	MAT1-1	1	2	B	G
PX-27	P	P	P	P	P	A	A	A	MAT1-1	1	2	B	G
PX-33	P	P	P	P	P	A	A	A	MAT1-1	1	2	A/D	G
PX-35	P	P	P	P	P	A	A	A	MAT1-1	1	2	B	G
PX-69	P	P	P	P	P	A	A	A	MAT1-1	1	2	B	G
QS-29	P	P	P	P	P	A	P	A	MAT1-2	1	2	E	D
QS-30	P	P	P	P	P	A	P	A	MAT1-2	1	2	E	D
QS-34	P	P	P	P	P	A	P	A	MAT1-2	1	2	E	D
QS-35	P	P	P	P	P	A	P	A	MAT1-2	1	2	E	D
QS-47	P	P	P	P	P	A	P	A	MAT1-2	1	2	E	D
QS-49	P	P	P	P	P	A	A	A	MAT1-2	1	2	E	G
QS-50	P	P	A	P	P	P	A	A	MAT1-2	1	0	D/E	H
QS-52	P	P	P	P	P	A	P	A	MAT1-2	1	2	E	D
QS-54	P	P	P	P	P	A	P	A	MAT1-2	1	2	E	D
QS-55	P	P	P	P	P	A	P	A	MAT1-2	1	2	E	D
QS-60	P	P	A	P	P	A	P	A	MAT1-2	1	0	E	K
QS-61	P	P	P	P	P	P	A	A	MAT1-2	1	2	D/E	C
QS-62	P	P	P	P	P	A	A	A	MAT1-2	1	2	E	G
QS-66	P	P	P	P	P	A	P	A	MAT1-2	1	2	E	D
QS-67	P	P	P	P	P	A	P	A	MAT1-2	1	2	E	D
QS-71	P	P	P	P	P	A	P	A	MAT1-2	1	2	E	D
QS-78	P	P	A	P	P	P	A	A	MAT1-2	1	0	D/E	H
QS-82	P	P	P	P	P	A	P	A	MAT1-2	1	2	E	D
QS-85	P	P	P	P	P	A	P	A	MAT1-2	1	2	E	D
QS-90	P	P	P	P	P	A	P	A	MAT1-2	1	2	E	D
QS-92	P	P	P	P	P	A	P	A	MAT1-2	1	2	E	D
QS-100	P	P	P	P	P	A	P	A	MAT1-2	1	2	E	D
QS-108	P	P	P	P	P	A	P	A	MAT1-2	1	2	E	D
ST-4	P	P	P	P	P	P	A	A	MAT1-1	3	2	A/D	C
ST-11	P	P	P	P	P	P	A	A	MAT1-1	1	2	A/D	C
ST-14	P	P	P	P	P	P	A	A	MAT1-1	1	2	A/D	C
ST-19	P	P	P	P	P	P	A	A	MAT1-1	1	2	A/D	C
ST-27	P	P	P	P	P	P	A	A	MAT1-1	1	2	A/D	C
ST-29	P	P	P	P	P	P	A	A	MAT1-1	1	2	A/D	C
ST-34	P	P	P	P	P	P	A	A	MAT1-1	1	2	A/D	C
ST-45	P	P	P	P	P	P	A	A	MAT1-1	1	2	A/D	C
ST-46	P	P	P	P	P	P	A	A	MAT1-1	1	2	A/D	C
ST-56	P	P	P	P	P	P	A	A	MAT1-1	1	2	A/D	C
ST-63	P	P	P	P	P	P	A	A	MAT1-1	1	2	A/D	C
ST-71	P	P	P	P	P	P	A	A	MAT1-1	1	2	A/D	C
ST-75	P	P	P	P	P	P	A	A	MAT1-1	1	2	A/D	C
ST-80	P	P	P	P	P	P	A	A	MAT1-1	1	2	A/D	C
ST-81	P	P	P	P	P	P	A	A	MAT1-1	1	2	A/D	C
ST-82	P	P	P	P	P	P	A	A	MAT1-1	1	2	A/D	C
ST-83	P	P	P	P	P	P	A	A	MAT1-1	1	2	A/D	C
ST-94	P	P	P	P	P	P	A	A	MAT1-1	1	2	A/D	C
ST-100	P	P	P	P	P	P	A	A	MAT1-1	1	2	A/D	C
ZZ-96	P	P	P	P	P	A	P	A	MAT1-2	1	2	E	D
ZZ-100	P	P	P	P	P	A	P	A	MAT1-2	1	2	E	D
ZZ-3	P	P	P	P	P	A	P	A	MAT1-2	1	2	E	D
ZZ-6	P	P	P	P	P	A	P	A	MAT1-2	1	2	E	D
ZZ-7	P	P	P	P	P	A	P	A	MAT1-2	1	2	E	D
ZZ-11	P	P	P	P	P	A	P	A	MAT1-2	1	2	E	D
ZZ-12	P	P	P	P	P	A	P	A	MAT1-2	1	2	E	D
ZZ-22	P	P	P	P	P	A	P	A	MAT1-2	1	2	E	D
ZZ-23	P	P	P	P	P	A	P	A	MAT1-2	1	2	E	D
ZZ-25	P	P	P	P	P	A	P	A	MAT1-2	1	2	E	D
ZZ-36	P	P	P	P	P	A	P	A	MAT1-2	1	2	E	D
ZZ-38	P	P	P	P	P	A	P	A	MAT1-2	1	2	E	D
ZZ-40	P	P	P	P	P	A	P	A	MAT1-2	1	2	E	D
ZZ-47	P	P	P	P	P	A	P	A	MAT1-2	1	2	E	D
ZZ-49	P	P	P	P	P	A	P	A	MAT1-2	1	2	E	D
ZZ-52	P	P	P	P	P	A	P	A	MAT1-2	1	2	E	D
ZZ-57	P	P	P	P	P	A	P	A	MAT1-2	1	2	E	D
ZZ-72	P	P	A	P	P	P	A	A	MAT1-2	1	0	D/E	H
ZZ-85	P	P	P	P	P	A	P	A	MAT1-2	1	2	E	D
19ZZ50	—	—	—	—	—	—	—	P	—	—	—	—	—
19ZZ57	—	—	—	—	—	—	—	P	—	—	—	—	—
AZ-4	P	P	P	P	P	A	A	A	MAT1-1	1	2	B	G
AZ-10	P	P	P	P	P	A	A	A	MAT1-1	1	2	B	G
AZ-17	P	P	P	P	P	A	A	A	MAT1-1	1	2	B	G
AZ-18	P	P	P	P	P	A	A	A	MAT1-1	1	2	B	G
AZ-23	P	P	P	P	P	A	P	A	MAT1-1	1	2	B	D
AZ-31	P	P	P	P	P	A	A	A	MAT1-1	1	2	B	G
AZ-37	P	P	P	P	P	A	A	A	MAT1-1	1	2	B	G
AZ-47	P	P	P	P	P	A	P	A	MAT1-2	1	2	E	D
AZ-48	P	P	P	P	P	A	P	A	MAT1-2	1	2	E	D
AZ-50	P	P	P	P	P	A	P	A	MAT1-2	1	2	E	D
AZ-79	P	P	P	P	P	A	P	A	MAT1-2	1	2	E	D
AZ-90	P	P	P	P	P	A	P	A	MAT1-2	1	2	E	D
JY-101	P	P	P	P	P	A	A	A	MAT1-1	1	2	A/D	G
JY-13	P	P	P	P	P	A	A	A	MAT1-1	1	2	A/D	G
JY-58	P	P	P	P	P	A	A	A	MAT1-1	1	2	A/D	G
JY-61	P	P	P	P	P	A	A	A	MAT1-1	1	2	A/D	G
JY-91	P	P	P	P	P	A	A	A	MAT1-1	1	2	A/D	G
JY-107	P	P	P	P	P	A	A	A	MAT1-1	1	2	A/D	G
JY-121	P	P	P	P	P	A	A	A	MAT1-1	1	2	A/D	G
JY-2	P	P	P	P	P	A	A	A	MAT1-1	1	2	A/D	G
JY-36	P	P	P	P	P	A	A	A	MAT1-1	1	2	A/D	G
JY-71	P	P	P	P	P	A	A	A	MAT1-1	1	2	A/D	G
JY-133	P	P	P	P	P	A	A	A	MAT1-1	1	2	A/D	G

## Sheet: Table S3
Table S3. Protein variation of AVR-Pita1 identified in rice blast population of the Sichuan basin
Haplotype	Amino acid sequence at polymorphic sites
	6	82	83	88	104	119	136	174	192
AF207841	-	N	D	R	K	E	G	V	Y
H1	L	S	N	K	N	E	E	I	C
H2	-	N	D	R	K	E	G	V	Y
H3	L	S	D	K	N	Q	E	I	Y
H4	L	S	D	K	N	E	E	I	C
H5	L	S	D	K	N	Q	E	I	C
